# Supplementary material for: Identification, screening and taste mechanisms analysis of two novel umami pentapeptides derived from the myosin heavy chain of Atlantic cod (Gadus morhua)
Source: Royal Society of Chemistry journal article supplement (doi:10.1039/d4ra00890a), 2024-01-01
Supplement: d4ra00890a1.pdf [file d4ra00890a1.pdf]

1 **Supplementary Information**

2

3 **Identification, screening and taste mechanisms analysis of two**  
4 **novel umami pentapeptides derived from myosin heavy chain of**  
5 **Atlantic cod (*Gadus morhua*)**

6

7 **Supplementary Fig. S1:** Profile of the peptides identified from the myosin heavy chain  
8 fast skeletal muscle [*Gadus morhua*].

9

10 **Supplementary Fig. S2:** Primary structures, and optimal 3D-conformation of the  
11 umami peptides LVDKL and ESKIL docked with T1R1/T1R3. (A) The peptide  
12 LVDKL; (B) The peptide ESKIL.

13

14 **Supplementary Table S1:** Recognition threshold values and sensory description of the  
15 umami peptides LVDKL and ESKIL.

16

17 **Supplementary Table S2:** The interaction between the umami peptides LVDKL and  
18 ESKIL with the T1R1/T1R3 simulated by molecular docking.

19

20 **Supplementary Table S3:** *In silico* prediction of properties of the umami peptides  
21 LVDKL and ESKIL.

23 Figure S1.

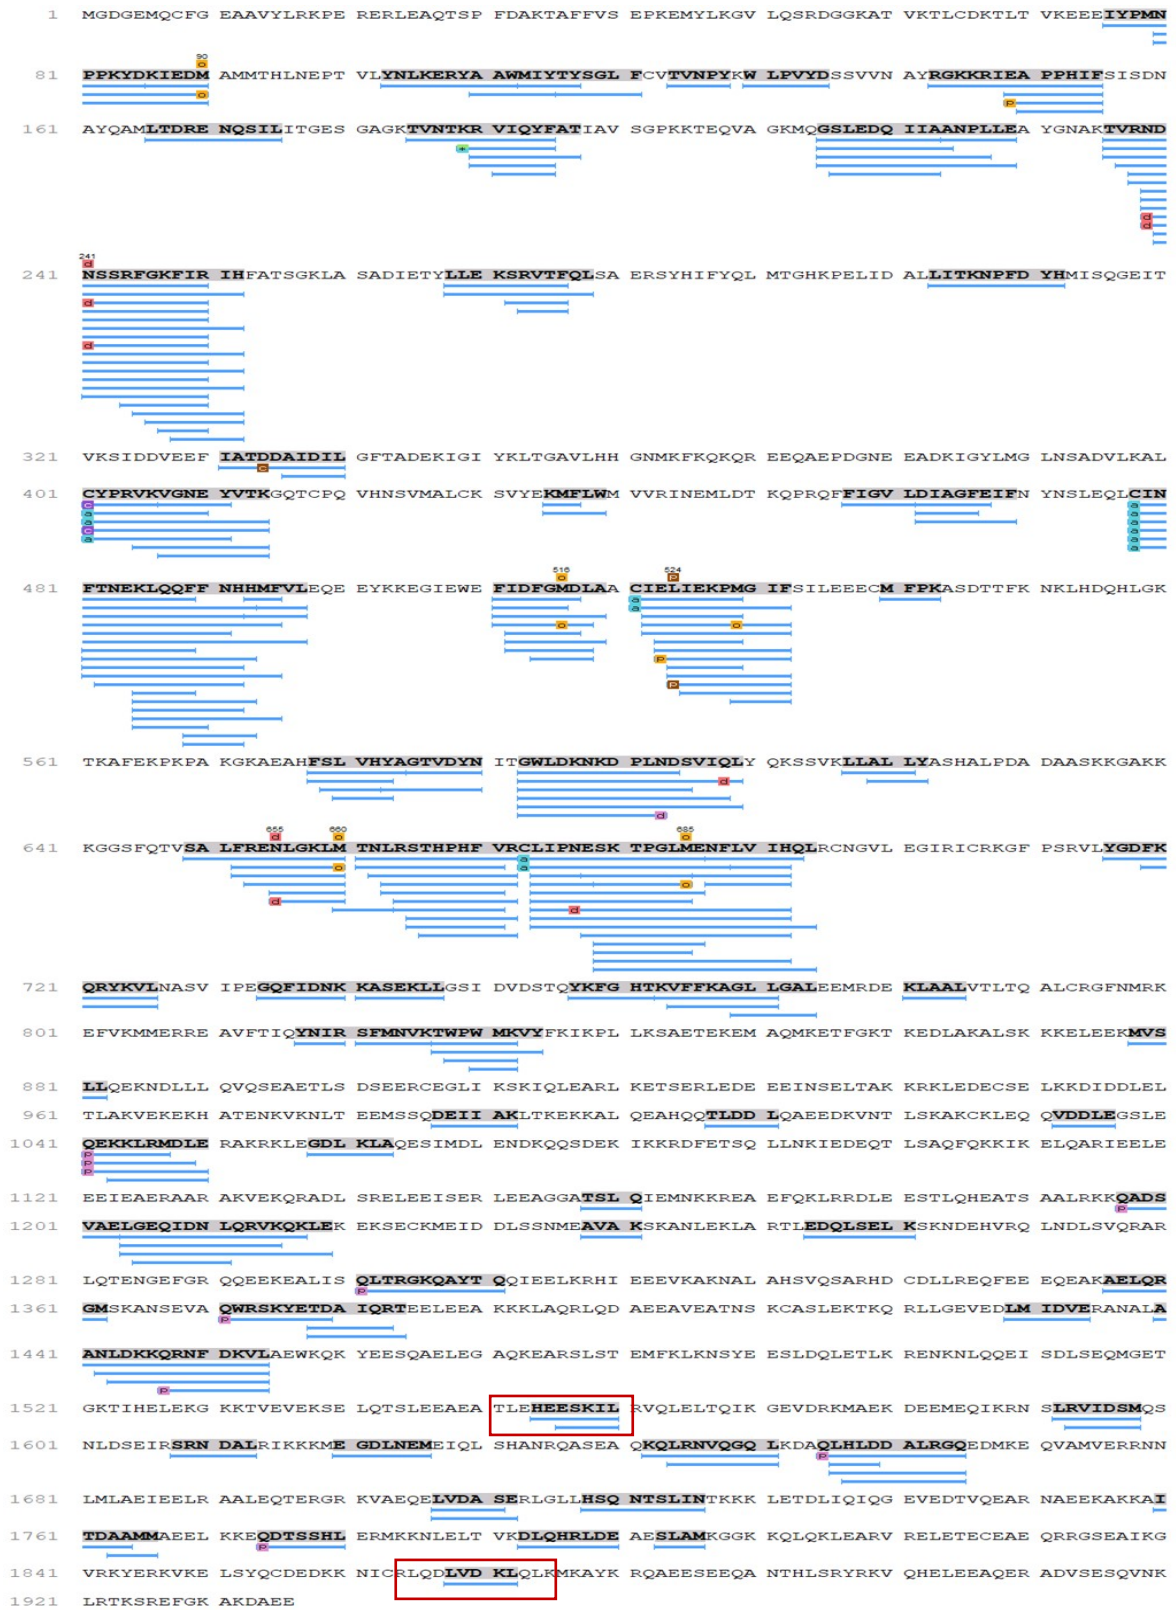

25 **Figure S2.**

(A)

**Leu-Val-Asp-Lys-Leu**

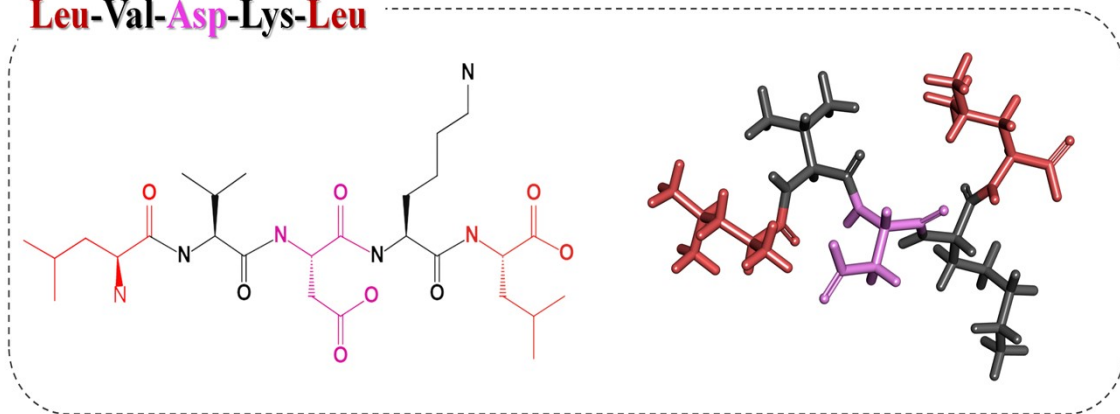

26

27

(B)

**Glu-Ser-Lys-Ile-Leu**

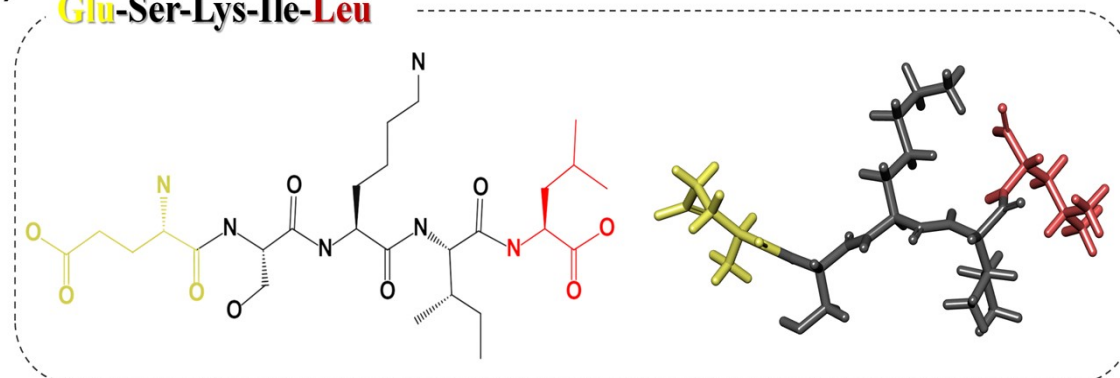

28

29 **Table S1** Recognition threshold values and sensory description of the umami peptide  
30 LVDKL and ESKIL.

| <b>Peptide</b> | <b>Threshold value (mM)</b> | <b>Sensory description</b>              |
|----------------|-----------------------------|-----------------------------------------|
| LVDKL          | 0.427                       | Umami, slight sourness, and sweetness   |
| ESKIL          | 0.574                       | Umami, bitterness, and slight sweetness |

31

32

33

35 **Table S2** The interaction between the umami peptide LVDKL and ESKIL with the  
 36 T1R1/T1R3 simulated by molecular docking.

| Peptide | Bond site | Interaction                  | Distance | Category      |
|---------|-----------|------------------------------|----------|---------------|
| LVDKL   | ARG712    | B:ARG712:NH1 - LVDKL:O91     | 4.59276  | Electrostatic |
|         | ARG712    | B:ARG712:HH12 -<br>LVDKL:O90 | 2.74973  | Hydrogen Bond |
|         | HIS915    | B:HIS915:HD1 - LVDKL:O91     | 2.66896  | Hydrogen Bond |
|         | GLN853    | LVDKL:H51 - B:GLN853:O       | 2.59138  | Hydrogen Bond |
|         | GLN853    | LVDKL:H69 - B:GLN853:OE1     | 1.85112  | Hydrogen Bond |
|         | ARG854    | B:ARG854:HA - LVDKL:O46      | 2.53144  | Hydrogen Bond |
|         | GLY911    | B:GLY911:HA1 - LVDKL:O47     | 2.5314   | Hydrogen Bond |
|         | HIS914    | B:HIS914:HE1 - LVDKL:O49     | 2.58556  | Hydrogen Bond |
|         | ARG854    | LVDKL:C12 - B:ARG854         | 5.16444  | Hydrophobic   |
|         | LEU852    | LVDKL:C28 - B:LEU852         | 5.20432  | Hydrophobic   |
|         | LEU912    | LVDKL:C81 - B:LEU912         | 4.48624  | Hydrophobic   |
|         | LEU852    | LVDKL:C85 - B:LEU852         | 4.68424  | Hydrophobic   |
|         | PHE851    | B:PHE851 - LVDKL:C12         | 5.10725  | Hydrophobic   |
|         | PHE851    | B:PHE851 - LVDKL:C32         | 5.01356  | Hydrophobic   |
| ESKIL   | GLN853    | B:GLN853:HN - ESKIL:O28      | 2.98375  | Hydrogen Bond |
|         | GLN853    | ESKIL:H4 - B:GLN853:OE1      | 1.86582  | Hydrogen Bond |
|         | GLN853    | ESKIL:H19 - B:GLN853:OE1     | 2.24902  | Hydrogen Bond |
|         | GLN853    | ESKIL:H26 - B:GLN853:OE1     | 3.01244  | Hydrogen Bond |
|         | PRO715    | B:PRO715:HD2 - ESKIL:O25     | 2.63504  | Hydrogen Bond |
|         | HIS914    | B:HIS914:HE1 - ESKIL:O50     | 2.66629  | Hydrogen Bond |
|         | VAL714    | ESKIL:C57 - B:VAL714         | 3.95501  | Hydrophobic   |
|         | VAL714    | ESKIL:C64 - B:VAL714         | 5.34317  | Hydrophobic   |
|         | LEU852    | ESKIL:C64 - B:LEU852         | 4.79617  | Hydrophobic   |
|         | HIS672    | B:HIS672 - ESKIL:C83         | 5.1179   | Hydrophobic   |

37

38

39 **Table S3** *In silico* prediction of properties of the umami peptide LVDKL and ESKIL.

| Peptide | Human intestinal absorption (HIA) | Acute oral toxicity | Instability index | Isoelectric point | Water solubility      | Net charge |
|---------|-----------------------------------|---------------------|-------------------|-------------------|-----------------------|------------|
| LVDKL   | -                                 | III                 | Stable            | 6.63              | Good water solubility | 0          |
| ESKIL   | +                                 | III                 | Unstable          | 6.85              | Good water solubility | 0          |
